1           **Active sensing in groups: (what) do bats hear in the sonar cocktail party nightmare?**

2

3                                   Thejasvi Beleyur, Holger R. Goerlitz

4

5   Acoustic and Functional Ecology, Max Planck Institute for Ornithology, Seewiesen, Germany

6

7   \*Corresponding authors:

8   Email: thejasvib@gmail.com, hgoerlitz@orn.mpg.de

9   Max Planck Institute for Ornithology

10   Acoustic and Functional Ecology

11   Eberhard-Gwinner-Straße

12   82319 Seewiesen, Germany

13

14   **Declarations of interest: none**

15

16   **KEYWORDS**

17   active sensing, bioacoustics, group behavior, psychoacoustics, sonar interference

18

19   **SIGNIFICANCE STATEMENT**

20   Close-by active sensing animals may interfere with each other. We investigated if and what  
21   many echolocators fly in a group hear – can they detect each other after all? We modelled  
22   acoustic and physical properties in group echolocation to quantify neighbor detection  
23   probability as group size increases. Echolocating bats can detect at least one of their closest  
24   neighbors per call up to group sizes of even 100 bats. Call parameters such as call rate and  
25   call duration play a strong role in how much echolocators in a group interfere with each  
26   other. Even when many bats fly together, they are indeed able to detect at least their  
27   nearest frontal neighbors – and this prevents them from colliding into one another.

28 **ABSTRACT**

29 Active sensing animals perceive their surroundings by emitting probes of energy and  
30 analyzing how the environment modulates these probes. However, the probes of  
31 conspecifics can jam active sensing, which should cause problems for groups of active  
32 sensing animals. This problem was termed the cocktail party nightmare for echolocating  
33 bats: as bats listen for the faint returning echoes of their loud calls, these echoes will be  
34 masked by the loud calls of other close-by bats. Despite this problem, many bats echolocate  
35 in groups and roost socially. Here, we present a biologically parametrized framework to  
36 quantify echo detection in groups. Incorporating known properties of echolocation,  
37 psychoacoustics, spatial acoustics and group flight, we quantify how well bats flying in  
38 groups can detect each other despite jamming. A focal bat in the center of a group can  
39 detect neighbors for group sizes of up to 100 bats. With increasing group size, fewer and  
40 only the closest and frontal neighbors are detected. Neighbor detection is improved for  
41 longer call intervals, shorter call durations, denser groups and more variable flight and sonar  
42 beam directions. Our results provide the first quantification of the sensory input of  
43 echolocating bats in collective group flight, such as mating swarms or emergencies. Our  
44 results further generate predictions on the sensory strategies bats may use to reduce  
45 jamming in the cocktail party nightmare. Lastly, we suggest that the spatially limited sensory  
46 field of echolocators leads to limited interactions within a group, so that collective behavior  
47 is achieved by following only nearest neighbors.

## 48 INTRODUCTION

49 Active sensing animals use self-generated energy to sense their surroundings by analyzing  
50 how objects around them change the emitted energy (1). Bats emit loud ultrasonic calls, and  
51 detect objects around them by listening to the echoes (2, 3) reflected off these objects.  
52 Active sensing is an effective sensory modality when the animal is solitary. However, when  
53 multiple active sensing animals emit pulses of energy in close proximity, they may 'jam' each  
54 other and mutually interfere with their ability to detect objects in their environment (1, 4). If  
55 groups of echolocating bats mutually jam or mask each other, they would not be able to  
56 detect each other. Due to the intense jamming, individuals would have a progressively  
57 difficult time detecting the echoes reflecting off their neighbors, and thus not detect them  
58 at all. Without detecting each other, groups of individuals cannot show collision free flight.  
59 However, many bat species are very gregarious, and fly and echolocate together in groups  
60 of tens to millions of bats. Bat groups also show coordinated behaviors in cave flights,  
61 evening emergences and mating swarms (5, 6). How is their ability to detect each other  
62 impaired with increasing group size? How many of its neighbors does a bat actually detect  
63 in the presence of intense jamming? What strategies may improve echo-detection and thus  
64 neighbor detection when many active sensing animals are together? We present biologically  
65 parametrized simulations to answer how bats manage to echolocate in the face of intense  
66 jamming.

67

68 In human psychophysics, the sensory challenge in perceiving an auditory cue among other  
69 similar sounds has been called the 'cocktail party problem' (7, 8) . When applied to bat  
70 echolocation, the cocktail party 'problem' has been elevated to the 'cocktail party  
71 nightmare', given the repetition rate, similarity and high amplitude of echolocation calls. On  
72 top of these factors, is the non-linear increase in the number of masking sounds with  
73 increasing group size (9). Empirical studies to date have investigated the cocktail party  
74 nightmare from a sender's perspective (sensu 7, 9 ). Through field observations, playback  
75 studies and on-body tags (11–22) we now know a range of echolocation strategies that bats  
76 show under challenging acoustic conditions. Bats can increase their call intensity, alter their  
77 call duration and frequency range, or suppress calling in the presence of conspecifics and  
78 noise playbacks (11, 20, 23, 24). In contrast to the many reports of bats' response to noisy  
79 conditions- very little work has been done in conceptually understanding how receiver

80 strategies might contribute to dealing with the cocktail party nightmare (25, 26). To our  
81 knowledge, biological modelling of the cocktail party nightmare from a receiver's  
82 perspective that includes the details of bat echolocation and auditory processing is lacking.  
83 We fill this gap in conceptual understanding by presenting a biologically parametrized model  
84 based on the known properties of bat audition and the acoustics of a multi-bat echolocation  
85 scenario. We quantified how well a bat flying with conspecifics can perceive its neighbors in  
86 terms of the returning echoes it detects. Through our simulations we arrive at a sensory  
87 estimate of what a bat in the cocktail party nightmare may be detecting, if anything at all.

88

89

## 90 MATERIAL AND METHODS

91 We model the echolocation of frequency-modulating (FM) bats. The calls of FM bats are  
92 typically downward frequency-modulated and of short duration ( $\leq 5$  ms). Each call is  
93 followed by a longer silence (80-150 ms) called the interpulse interval (27). FM bats thus  
94 sense their world 'stroboscopically' by emitting a call and listening for the returning echoes  
95 in the interpulse interval (28). In the absence of any loud conspecific calls, a bat is able to  
96 hear all returning echoes and thus to detect all objects around it. However, in the presence  
97 of other loud bat calls, some of its own returning echoes may be masked. In that case, the  
98 bat will hear a few or none of the returning echoes. This corresponds to the bat detecting a  
99 few or none of the surrounding objects. In the cocktail party nightmare the 'objects' each  
100 bat is trying to detect are its neighbors.

101

102 Our model of the cocktail party nightmare is designed to describe the auditory scene (9) of a  
103 bat emerging from a cave in a group as it echolocates on the wing. A focal bat flying in a  
104 group of  $N$  bats may detect up to  $N-1$  of its neighbors (excluding itself), which is equivalent  
105 to hearing  $N-1$  returning echoes. The focal bat receives two kinds of loud masking sounds  
106 that interfere with the detection of its neighbors: 1) the  $N-1$  loud calls emitted by other bats  
107 in the group, and 2) the secondary echoes created by the call of a neighboring bat, reflecting  
108 once off another bat, and arriving at the focal bat. Every neighboring bat call generates  $N-2$   
109 secondary echoes, meaning that the focal bat can receive up to  $N-1 \times N-2$  secondary echoes  
110 (**Fig. 1**). We implemented a spatially explicit 2-dimensional simulation of bat echolocation,  
111 sound propagation and sound reception and include mammalian auditory phenomena to

112 quantify how many and which neighbors a bat can detect in the sonar cocktail party  
113 nightmare. We then explored how changes in group size and in sender strategies affect  
114 neighbor detection in a group.

115

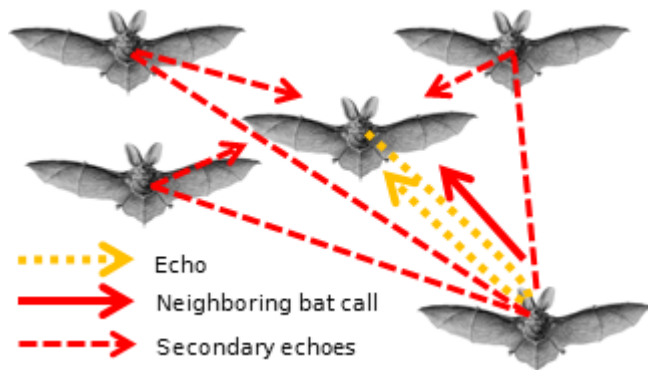

116

117 **Fig. 1. Schematic of the cocktail party nightmare.** Arrows indicate the different types of sounds  
118 received by a focal bat: it needs to hear the echoes returning from its own calls (orange) to detect its  
119 neighbors, despite the masking by the calls of neighboring bats (solid red) and their secondary echoes (dashed  
120 red). Here, only one target echo off a single neighbor, only one representative neighboring bat call, and its set  
121 of secondary echoes are shown. In total, for a group of  $N$  bats, the focal bat will receive  $N-1$  echoes,  $N-1$   
122 neighboring bat calls and  $N-1 \times N-2$  secondary echoes. Bat drawing: *Kunstformen der Natur* (Ernst Haeckel,  
123 1899).

124

## 125 **Model scenarios**

126 We ran two model scenarios to test the effect of 1) increasing group size and of 2) variation  
127 in call parameters, group geometry and acoustic parameters on neighbor detection. In all  
128 models, we used the central-most bat in the group as the focal bat.

129

130 **Scenario 1: Effect of group size on neighbor detection:** We simulated groups of 5, 10, 30,  
131 50, 75, 100 and 200 well-aligned bats with identical echolocation and hearing properties  
132 flying at a minimum inter-bat distance of 0.5 m (**Table 1** for full model parameters). The  
133 number and location of neighbors detected by the focal bat were recorded in every  
134 simulation run.

135

136 **Scenario 2: Effect of call parameters, group geometry and acoustic parameters on**  
137 **neighbor detection:** Here, we varied other parameters relevant to the cocktail party

138 nightmare (**Table 1**) while keeping group size constant (N=100, i.e., the largest group size  
 139 from Scenario 1 with biologically relevant neighbor detection rate). We varied call  
 140 parameters (interpulse interval, call duration, source level), group parameters (heading  
 141 variation, minimum inter-bat spacing) and acoustic parameters (atmospheric absorption,  
 142 acoustic shadowing).

143

144 **Table 1. Model parameters for both model scenarios.** Scenario 1 modelled the effect of  
 145 group size, while other parameters were fixed, resulting in 7 parameter combinations (one per group  
 146 size). Scenario 2 modelled the effect of other relevant parameters, while group size was kept constant  
 147 at 100 bats, resulting in a combined set of 1200 parameter combinations.

| <i>Parameter</i>                            | <b>Scenario 1: Effect of Group Size</b> | <b>Scenario 2: Effect of call parameters, group geometry and acoustics</b> |
|---------------------------------------------|-----------------------------------------|----------------------------------------------------------------------------|
| <i>Group size</i>                           | 5, 10, 30, 50, 75, 100, 200             | 100                                                                        |
| <i>Interpulse interval (ms)</i>             | 100                                     | 25, 50, 100, 200, 300                                                      |
| <i>Call duration (ms)</i>                   | 2.5                                     | 1, 2.5                                                                     |
| <i>Source level (dB SPL re 20μPa at 1m)</i> | 100                                     | 94, 100, 106, 112, 120                                                     |
| <i>Minimum inter-neighbor distance (m)</i>  | 0.5                                     | 0.5, 1.0                                                                   |
| <i>Group heading variation (°)</i>          | 10                                      | 10, 90                                                                     |
| <i>Atmospheric attenuation (dB/m)</i>       | -1                                      | 0, -1, -2                                                                  |
| <i>Acoustic shadowing</i>                   | Yes                                     | No, Yes                                                                    |

148

149

### 150 **Model implementation**

151 Each model run simulated one inter-pulse interval of the focal bat, and we calculated the  
 152 timing and received level of all sounds (target echoes, masking calls, and secondary echoes)  
 153 that arrived at the focal bat during that inter-pulse interval. Each model run simulated a  
 154 series of sounds that arrived during an interpulse interval following the focal bats' call,  
 155 based on a spatially explicit distribution of a group of bats (**SI Appendix, Schematic S1**). At  
 156 the beginning of every model run, *N* bats were placed in a 2D space with randomly assigned  
 157 heading directions. For each neighboring bat, we calculated its angle and distance to the  
 158 focal bat. The received level was calculated based on a common source level for all bats,  
 159 spherical and atmospheric spreading over each call's and echo's travel distance, and  
 160 acoustic shadowing. Acoustic shadowing is the reduction in received level of a sound due to  
 161 obstructions in its path. A sound in the cocktail party nightmare may pass around obstacles  
 162 (other bats) as it propagates from source to receive. The reduction in received level was

163 measured and calculated as a linear function of the number of bats obstructing the path  
164 between source and receiver (See SI Section 1.9). For target and secondary echoes, we also  
165 considered monostatic and bistatic target strengths measured in this paper (see SI Section  
166 1.8).

167  
168 The arrival time of target echoes within the interpulse interval was determined according to  
169 the two-way travel time to the echo-reflecting neighboring bat. The arrival time of masking  
170 calls and secondary echoes was uniformly random within the interpulse interval. The  
171 random arrival time assignment of calls and secondary echoes recreates the non-  
172 coordinated echolocation of all bats in the group. It is unlikely that multiple bats in large  
173 groups can coordinate their calls effectively, and independent calling has been reported  
174 even in small groups of four bats (29).

175  
176 All bats in a group were identical in their calling properties, and we treated all sounds as  
177 constant tones of equal duration, i.e., we did not explicitly model spectral emission,  
178 propagation and reception properties. The only difference between each of the sounds was  
179 their path and source of sound production. The omission of spectral properties is a  
180 conservative choice that assumes maximal masking of the primary echoes, thus allowing us  
181 to study the role of intensity differences and temporal separation between target echoes  
182 and masking sounds.

183  
184 Once we calculated the timing and received level of all sounds at the focal bat, we  
185 accounted for directional hearing sensitivity (**SI Appendix, Fig. S3**) and spatial unmasking.  
186 Spatial unmasking describes the reduction in experienced masking as the arrival angle  
187 between masker and target sound increases (30, 31). We simulated spatial unmasking by  
188 the reduction of a masker's effective received level based on its angular separation to an  
189 echo. For each echo, the same masker will have a different effective masking level as its  
190 relative angle of arrival will be unique for each echo. We thus calculated the effective  
191 masking level of each masker for each echo. The effective masking levels of all maskers were  
192 then combined to form a time-variant and echo-specific 'masker SPL profile' (**SI Appendix,**  
193 **Fig. S5D**). This is essentially the joint sound pressure level of all maskers over time. We then  
194 expressed this echo-specific masker SPL profile in relation to the echo's SPL, thus obtaining

195 a relative 'echo-to-masker ratio profile' (**SI Appendix, Fig. S5E**). This is equivalent to a signal-  
196 to-noise ratio profile, where the echo is the signal and the masker profile is the noise.

197

198 In addition to angular separation, signal detection is also determined by the temporal  
199 separation between signal (echo) and masker (24, 32, 33). Masking increases as the masker  
200 arrives closer in time to the echo. Masking occurs over longer durations when maskers  
201 arrive before the signal (forward masking) than afterwards (backward masking). We  
202 recreated the asymmetric masking by a 'temporal masking envelope' temporally centered at  
203 the echo (**SI Appendix, Fig. S1**). The echo was considered heard if the echo-to-masker ratio  
204 profile was above the temporal masking envelope. We allowed short drops of the echo-to-  
205 masker ratio profile below the temporal masking envelope, for a combined maximum  
206 duration of less than 25% of an echo's duration (of 1 or 2.5 ms). Alternatively, we defined an  
207 echo to be masked (= not heard), if the echo-to-masker ratio profile was below the temporal  
208 masking envelope for more than 25% of the echo duration. The 25% threshold was an  
209 arbitrarily chosen conservative value to prevent rare bursts of high sound pressure level that  
210 are unlikely to affect echo detection biologically.

211

### 212 **Model parametrization**

213 We implemented a detailed set of echolocation, group and sound properties in our model,  
214 including call and hearing directionality, spatial unmasking, temporal masking, group  
215 geometry and details of sound propagation. These properties were parameterized based on  
216 published results wherever available. Acoustic shadowing and target strengths (monostatic  
217 and bistatic) of bats were specifically measured for this work. All details of the model  
218 parameters including our respective measurements and on model implementation are  
219 presented in the Supplementary Information.

220

221

222

223

224

225

226



## 227 RESULTS

228

### 229 Effect of group size on neighbor detection

230 At group sizes of five and ten, the focal bat hears per call the echoes of most or all of its  
231 neighbors (median: 4 and 8 echoes at N=5 and 10, respectively; **Fig. 2**). At progressively  
232 larger group sizes, the median number of detected neighbors drops to between 4-0 at group  
233 sizes of 30-200. Yet even in a group of 100 bats, while the median number of detected  
234 neighbors is zero, the 90<sup>th</sup> percentile is one, showing that a neighbor is not detected with  
235 each call, but occasionally. Beyond a group of 100 bats, the focal bat typically detects no  
236 neighbors at all. The initial rise in detected neighbors in groups of 5-30 bats is primarily  
237 caused by the increased number of neighbors that could be detected, which is soon  
238 counteracted by the intense masking that rises non-linearly with group size.

239

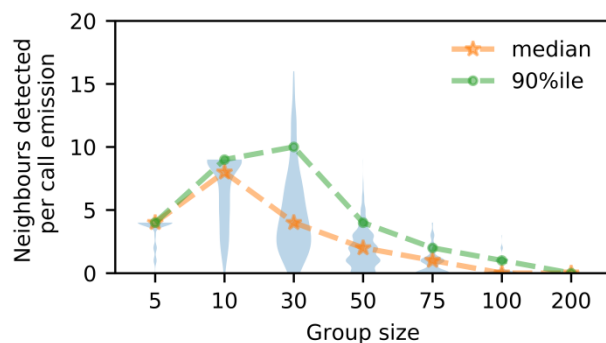

240

241 **Fig. 2. Number of detected neighbors per call by a focal bat in the center of a group.** The  
242 initial rise in the number of detected neighbors is because there are indeed more neighbors and the degree of  
243 masking is negligible. However, with increasing group sizes, most of the neighbors cannot be detected any  
244 more, and progressively fewer neighbors are detected per call. Violin plots show the distribution of the  
245 number of neighbors detected per call, and their median and (stars, orange) and 90<sup>th</sup> percentile (dots, green).

246

247 We next derived the probability of detecting at least one neighbor, which allows describing  
248 the average rate of neighbor detection (**Fig. 3A**, blue). At smaller group of 5 to 30 bats, the  
249 focal bat detects at least one neighbor per call at above 0.95 probability. At larger group  
250 sizes (50-100), the probability of detecting at least one neighbor drops rapidly to 0.3 per call  
251 in a group of 100 bats, and is basically zero for a group of 200 bats (0.004 probability). A bat  
252 (with 10 Hz calling rate) flying in a group of 100 bats will thus detect at least one neighbor  
253 around 3 times per second (~3 Hz detection rate), while a bat flying in a group of 30 bats will

254 detect at least one neighbor almost every time (9.5 Hz detection rate). The probability of  
255 detecting multiple bats per call is lower than just detecting at least one bat (**Fig. 3A**). Yet,  
256 even in a group of 50 bats, the focal bat has a probability of detecting at least 2 and 4  
257 neighbors per call of about 50 and 10%, respectively.

258

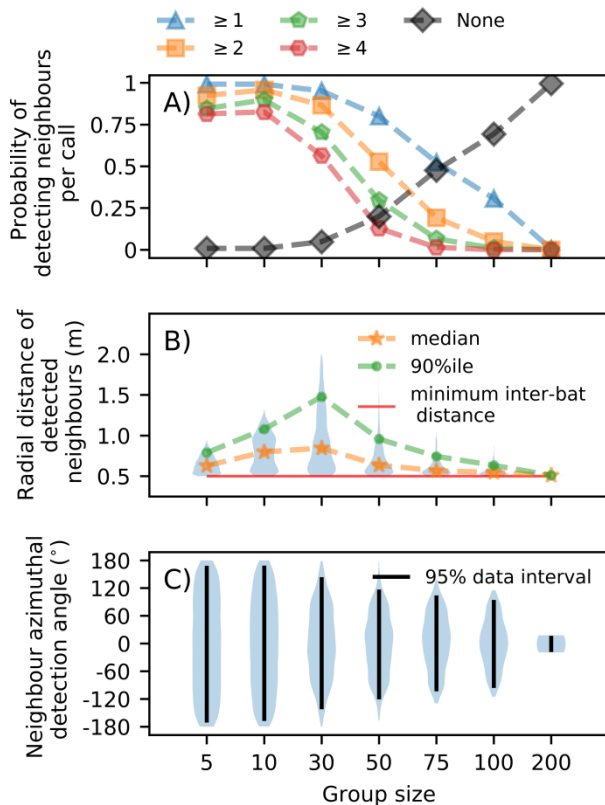

259

260

### 261 **Fig. 3. Characterization of the focal bat's perception.**

262 **A)** The probability of detecting  $\geq X$  neighbors per call ( $X=1,2,3,4$ , or none). Even in groups of up to 100 bats, the  
263 focal bat has a  $\sim 0.3$  probability of detecting at least one neighbor per call. In even larger groups (200 bats), no  
264 neighbors are detected anymore.

265 **B)** With increasing group size, a focal bat only detects its closest neighbors. Initially, the radial distance of  
266 detected neighbors increases because the spatial extent of a group increases with group size (at 5, 10, 30 bats:  
267 radius = 0.75, 1.12; 1.97 m), but it then drops down to the nearest neighbors beyond 30 bats.

268 **C)** The azimuthal location of detected neighbors, showing a increasing frontal bias with increasing group size.  
269 Although neighbors were uniformly distributed in azimuth, the frontal bias of call and hearing directionality  
270 means that frontal returning echoes are louder than peripheral ones.

271

272

273 We next quantified which neighbors the focal bat detects. Detection is generally limited to  
274 nearby neighbors (**Fig. 3B**) and, with increasing group size, to neighbors in front of the focal  
275 bat (**Fig. 3C**). At a group size of 30 bats, the focal bat occasionally detects neighbors that are  
276 up to 2 m away in radial distance, which is the furthest neighbor distance. With increasing  
277 group sizes, despite the group being more spread out, the focal bat can only detect its  
278 nearest neighbors (e.g. neighbors at ~0.5 m in a group of 200 bats; **Figure 3B**). In the  
279 azimuthal plane, at small group sizes the focal bat initially detects neighbors all around it  
280 (95%ile-neighbor detection angle  $\geq 237^\circ$  for up to 50 bats; **Fig. 3C**). With increasing group  
281 size, a frontal bias in neighbor detection appears (95%-neighbor detection angle:  $191\text{-}35^\circ$  for  
282 100 and 200 bats; **Fig. 3C**).

283

#### 284 **Effect of call parameters, group geometry and acoustic phenomena on neighbor** 285 **detection:**

286 We next analyzed how variation in call parameters, group structure, and acoustic  
287 parameters affected neighbor detection. We fixed the group size to 100, as at this size, the  
288 focal bat could typically detect at most one neighbor (90%ile, **Fig. 2**) at 0.3 probability  
289 (**Fig. 3A**) per call. We thus reduced the output of each simulation run to a binary neighbor  
290 detection score of 1 (detection) or 0 (no detection). We analyzed the effect of each  
291 parameter on neighbor detection with a logistic regression, treating all parameters as  
292 categorical and using their value in the previous model as reference (parameter range in  
293 **Table 1**).

294

295 The call parameters *interpulse interval* and *call duration* showed the strongest effect (**Fig. 4;**  
296 **SI Appendix, Table S2**). Increasing the interpulse interval from 100 ms to 200 and 300 ms  
297 increases neighbor detection probability by about 15 and 75 times, while reducing it to  
298 50 ms lowers neighbor detection to 0.05 (**Fig. 4A**). Shortening call duration from 2.5 ms to  
299 1 ms led to 35x higher neighbor detection (**Fig. 4B**). Call source level had no effect (**Fig. 4C**).  
300 Group geometry also influenced neighbor detection probability, but less than changing call  
301 parameters. Flying at larger interbat distances of 1.0 m leads to worse neighbor detection  
302 (odds-ratio: 0.31) compared to denser groups with 0.5 m interbat distance (**Fig. 4D**). Groups  
303 where individuals head in a generally common direction have worse neighbor detection

304 than groups with variable heading (or echolocation beam) direction (odds-ratio: 1.32, **Fig.**  
305 **4E**).

306

307 Among the physical parameters, *acoustic shadowing* increased neighbor detection (odds  
308 ratio: 0.75) compared to simulations without acoustic shadowing, while *atmospheric*  
309 *attenuation* had a negligible effect (**Fig. 4 F,G**).

310

311

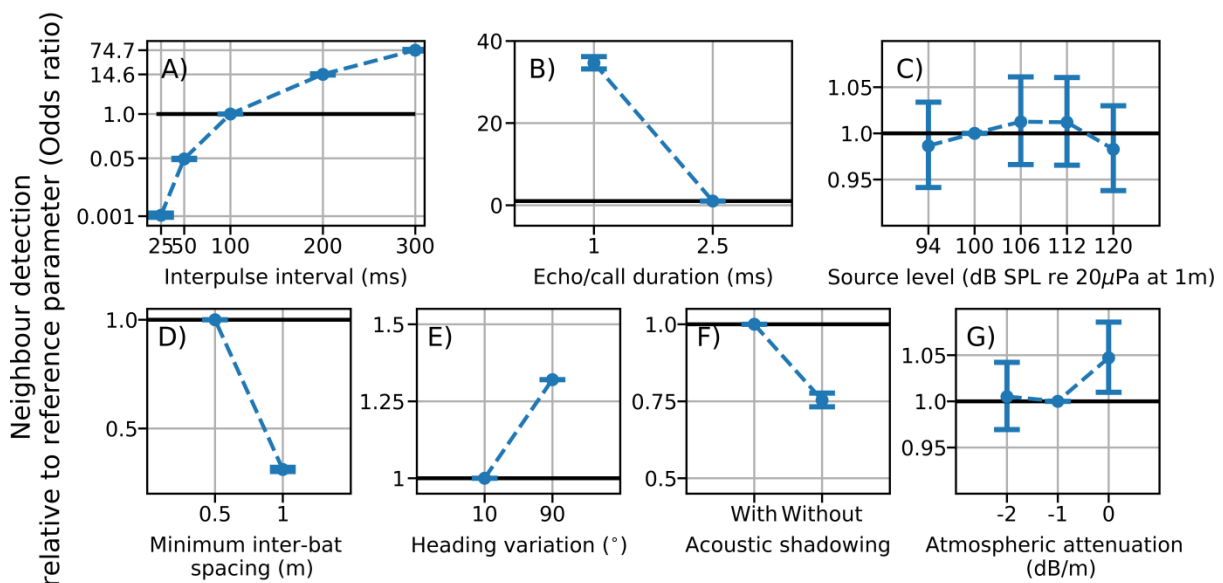

312

313 **Fig. 4. Effect of call parameters (A-C), group geometry (D-E) and acoustic parameters (F-G)**  
314 **on neighbor detection.** Each plot shows the probability of neighbor detection (model estimate and 95%  
315 confidence interval of odds ratio) when changing model parameters relative to the reference parameter used  
316 in the previous simulations of scenario 1 (**Table 1**). Odds ratios above and below one indicate a higher and  
317 lower neighbor detection probability, respectively, indicated by the horizontal reference line.

318 **A-C) Call parameters:** Longer interpulse intervals (A) and shorter call durations (B) increase neighbor detection  
319 probability, while call source level (C) has no effect.

320 **D,E) group geometry:** Neighbor detection is better in groups that are tightly packed (D) and with higher  
321 heading variation (E).

322 **F,G) Effect of acoustic parameters:** Acoustic shadowing by bats in groups improves neighbor detection  
323 probability (F), while atmospheric attenuation has a negligible effect (G).

324

325

326

327

328 **DISCUSSION**

329 We present a conceptual framework to quantify what a focal bat experiences in the sonar  
330 cocktail party nightmare. We quantified the probability of detecting neighbors across a  
331 range of group sizes, which allows calculating the rate at which a focal bat detects its  
332 neighbors. When flying alone, a focal bat will detect objects around it at a rate equal to its  
333 call rate, while in a group, its object detection rate is reduced due to masking. We show that  
334 even in a group of 100 bats, bats still detect at least one neighbor per call about 3 times per  
335 second (for a 10 Hz call rate), while in smaller group sizes, neighbor detection rate is larger  
336 at 5-10 Hz. Bat echolocation is generally 'stroboscopic', meaning that information is received  
337 intermittently with time gaps (3). We suggest that bats in smaller group sizes still  
338 experience a sufficiently high information update rate for performing collision avoidance  
339 and neighbor following. With increasing group size, perception might become 'hyper-  
340 stroboscopic', i.e., so scarce that different sensorimotor heuristics might be required to  
341 maintain group coordination.

342  
343 The low level of masking at smaller group sizes allows the focal bat to detect all its  
344 neighbors per call. With increasing group size, however, the focal bat detects maximally one  
345 neighbor per call in a group of 100 bats. This neighbor detection rate of at least one  
346 neighbor per call even in large group sizes provides a formal sensory basis for group  
347 movement in active sensing animals. While a bat in a large group cannot track the position  
348 of all its neighbors, it still can track the movement of a few neighbors, specifically those  
349 close to and in front of it. This reduction in rate, range and direction of detected neighbors  
350 has predictive consequences for the kind of collective behavior bat groups may show in  
351 nature. Many models of collective movement assume that each individual in a group detects  
352 the position and orientation of neighbors in the whole of its sensory volume, and then  
353 performs an 'averaging' across all neighbors to decide its next movement (34–37), leading to  
354 the impressive coordinated behaviors of fish schools and insect swarms (38, 39). As the  
355 number of neighbors that an individual detects decreases, more 'limited interactions' begin  
356 to dominate, causing anisotropy in the group structure (40, 41). For bats in the cocktail party  
357 nightmare, we predict that large groups may show higher anisotropy than smaller groups  
358 due to the limited number of neighbors that they can detect and react to. All things being  
359 equal, we predict that in large groups (>50 bats), the neighbors in the frontal field of a bat

360 will have a disproportionate influence on its movement decisions. Bats in larger groups may  
361 thus maintain higher alignment with their frontal neighbors compared to bats in smaller  
362 groups.

363

364 Our simulations allow for a direct quantitative comparison of the effects of echolocation,  
365 group geometry and acoustic phenomena in group echolocation. Among the call parameters  
366 tested, reducing call rate (increasing interpulse interval) was most effective in increasing  
367 neighbor detection in jamming conditions, matching experimental evidence for reduced  
368 calling rate in *Tadarida brasiliensis* (19) (20). In contrast, other FM bat species increase their  
369 call rates in groups and background noise (11, 15, 42, 43). Likewise, our result that shorter  
370 call duration should improve neighbor detection is opposite to experiments showing that  
371 most bat species increased call duration in the presence of maskers (11, 23, 24, 43, 44),  
372 except (42). Lastly, our result of no effect of changing source level on neighbor detection  
373 might also seem to differ from experimental data showing that bats in laboratory conditions  
374 do increase source level in the presence of maskers (11, 23, 43, 44). While there might be  
375 species-specific differences, we suggest that these differences are mostly due to differences  
376 in experimental situations. Bats in these experiments experienced constant maskers, thus  
377 calling more often, for longer and for louder improved the bats' signal redundancy, echo-to-  
378 masker ratio, and overall echo detection. In contrast, our model simulates group flight of  
379 many bats with simultaneous and uniform changes in their call parameters. When all bats in  
380 a group shorten call duration, this reduces the overall duration of masking sounds, thus  
381 improving echo detection. Likewise, when all bats in a group increase their call amplitudes  
382 to optimize their own echo-to-masker ratios, all bats will eventually call at their maximum,  
383 with no overall effect on neighbor detection. Analyzing bat calls in mass emergences is  
384 technically challenging and it remains unknown whether *T. brasiliensis* and other gregarious  
385 bat species reduce their call rate in the field.

386

387 Bat aggregations show a variety of structure across behavioral contexts, from well-aligned  
388 almost parallel flight during roost emergences, to more variable and less-aligned flight in  
389 mating swarms and when circling in limited cave volumes. We show that this group  
390 structure itself affects how well bats can detect each other. Bats detect their neighbors  
391 better in less-aligned groups compared to more aligned groups. During aligned emergence

392 flight, the focal bat always receives loud frontally directed masking calls from bats behind it,  
393 in addition to the relatively loud side-calls emitted by neighbors to its left and right. In  
394 contrast, during less-aligned swarming flight, the relative orientation of the bats is more  
395 distributed and changing, with the focal bat experiencing a wider dynamic range of masker  
396 levels (i.e., louder and fainter masking calls originating from a wider range of directions  
397 around it). This increased dynamic masker range allows for better neighbor-echo detection,  
398 as there will be drops in echo-to-masker ratios due to changing received masker level. This  
399 effect is beneficial for enabling swarming flight, as the collision risk in less-aligned flight is  
400 likely higher compared to the more aligned emergence flight. Inter-individual distance is  
401 another parameter of group structure, and we show that neighbor detection is better in  
402 dense groups. This might seem unexpected given that the received SPL of the maskers is  
403 higher the closer the bats are. However, received echo levels are also higher when bats are  
404 closely spaced. Since echo SPL drops with 12 dB per doubling of distance, but masker call  
405 SPL only by 6 dB doubling of distance, the echo-to-masker ratio is higher at shorter than  
406 longer interbat distances. It would be interesting to examine if perhaps large groups in the  
407 field actually fly closer to each other than smaller groups.

408  
409 While we only modeled neighbor detection for the central-most bat in a group, its position  
410 in the group (e.g., central, frontal or at the back) is likely to also have an effect on the  
411 number and received level of maskers, and thus on the number of detected echoes.  
412 However, we expect the obtained trends to remain qualitatively the same regardless of  
413 focal bat position. Particularly, we assume that masking will increase with group size, and  
414 only the exact group size at which a given level of masking (e.g. X% neighbor detection  
415 probability) is obtained will change depending on the focal bat's position in the group.

416 We furthermore show that it is important to consider bats not only as sources of echoes to  
417 be detected and of masking sounds, but also as obstructions to sound that actually alleviate  
418 the cocktail party nightmare. While the detected echoes originate from nearby bats, they  
419 are typically not shadowed. In contrast, the masking calls and secondary echoes can arrive  
420 from distant neighbors, thus passing through multiple other bats. Shadowing thus consists  
421 of the overall reduction in masker levels, which increases echo-to-masker ratios for the  
422 comparatively loud echoes returning from nearby neighbors.

423

424 Our results show that the cocktail party may not be as much of a ‘nightmare’ as previously  
425 thought (9). We show that the modelled psychoacoustic, spatial and acoustic properties act  
426 together to alleviate the ‘nightmare’ into a ‘challenge’. When bats are flying in a multi-echo  
427 environment, our results show that a bat will always hear some echoes after a call emission,  
428 and very rarely no echoes at all. This parallels the phenomenon of auditory ‘glimpsing’  
429 reported in the human auditory cocktail party where individuals may follow conversations  
430 by perceiving parts of detected speech rather than whole sounds (45).

431

### 432 **Improved echo-detection in real-world situations**

433 We present a first order approximation to the sonar cocktail party nightmare, including  
434 many relevant biological, physical and auditory mechanisms. Bats are expert echolocators  
435 and can detect echoes and fly under challenging conditions (24, 46–48). Bats rapidly adjust  
436 their call behavior in terms of their call duration, source level and interpulse intervals (49,  
437 50), integrate echoic information over multiple call emissions (51) and actively track objects  
438 by aiming their calls at them (52, 53). While we tested a range of different echolocation call  
439 parameters, our model implemented these parameters as fixed values that do not vary over  
440 time, thus lacking the dynamic nature of a real bat in the field.

441

442 Furthermore, we did not model the spectral content of echo or masker sounds, and  
443 analyzed echo detection based on a fixed threshold of echo-to-masker-ratio. In contrast,  
444 real echolocation calls possess a time-variant spectral pattern that is species and even  
445 individual-specific (13, 54), which can reduce echo masking. Masking is strongest when  
446 target and masker overlap both in time and in frequency (i.e., fall within the same ‘critical  
447 band’ of the auditory system, (32, 55). The frequency-modulation of bat calls means that  
448 even when maskers and echoes partially overlap in time, they will not necessarily overlap in  
449 frequency, thus reducing the likelihood of masking. The individuality of bat calls may help a  
450 bat reject the secondary echoes from other bats’ calls by forming separate auditory streams  
451 (56) for its own echoes and others’ echoes. Given the scarcity of empirical data to  
452 parametrize the effect of spectral differences on echo detection in masking conditions, we  
453 did not include it in the model, thus simulating a conservative worst case scenario where all  
454 sounds lie in the same frequency band. Additionally, attentional processes strongly improve  
455 target detection by improving the required signal-to-noise ratio despite the presence of



456 maskers with similar time-frequency structure (57). Under real-world conditions, it is likely  
457 that masking in groups is even less than simulated here.

458

459 Due to the scarcity of published data, the inter-individual and inter-specific variation in the  
460 temporal and spatial masking functions used in our model is unknown. The temporal  
461 masking envelope will arguably be similar in many bat species, showing the typical  
462 mammalian pattern of increased target detection threshold with reduced temporal  
463 separation between target and masker. Spatial unmasking occurs through the nonlinear  
464 interaction of pinnae shape, cochlear and higher auditory processing (30, 58). As pinna  
465 shape and associated acoustic receiver characteristics strongly vary in echolocating bats  
466 (59), leading to species-specific spatial unmasking and echo detection rates in the cocktail  
467 party nightmare.

468

469

## 470 **CONCLUSION**

471 We provide a conceptual framework to explain how active sensing animals such as  
472 echolocating bats successfully navigate in groups despite mutually jamming each other. The  
473 intense jamming in groups might lead to individuals only detecting their nearest frontal  
474 neighbors, which might drive limited interactions within a group. We also show that call  
475 parameters and group geometry determine the challenge in the cocktail party nightmare.  
476 Recent advances in on-body acoustic tags (42, 60), signal analysis (61) and acoustic tracking  
477 (62) of echolocating animals in the field might facilitate future experimental validation of  
478 our model predictions. As our model formulation is not constrained to echolocation in bats,  
479 it can be parametrized to other echolocators such as oilbirds, swiftlets and odontocetes (63,  
480 64) that also echolocate in groups and suffer from cocktail-party like conditions.

481

482

483

484

485

486

487

488 **Author Contributions**

489 Conceptualization: HRG, TB; Code: TB; Analysis and Visualization: TB; Writing: TB, HRG

490

491 **Acknowledgements**

492 We thank the members of the Acoustic and Functional Ecology Group for insightful  
493 comments and support, Claire Guérin for contributing to code development, the MPI for  
494 Ornithology for excellent research infrastructure, and two anonymous reviewers for helpful  
495 comments.

496

497 **Funding**

498 TB was funded by a doctoral fellowship from the German Academic Exchange Service  
499 (DAAD) and the IMPRS for Organismal Biology. HRG was funded by the Emmy Noether  
500 program of the German Research Foundation (DFG, GO 2091/2-1, GO 2091/2-2). The  
501 simulation runs in this paper were funded by a Google (Research Credits) grant to TB.

502

503 **Data and code availability**

504 All code required to replicate the simulations, results, analyses and figures in this paper are  
505 available at this Zenodo repository link: <https://doi.org/10.5281/zenodo.3514156> . All raw  
506 data and code required to replicate the results of the experimental parametrizations (target  
507 strength and acoustic shadowing) are available at the following repository link:  
508 <https://doi.org/10.5281/zenodo.3469845> .

509 **References:**

- 510 1. Nelson ME, MacIver MA (2006) Sensory acquisition in active sensing systems. *J Comp*  
511 *Physiol A Neuroethol Sensory, Neural, Behav Physiol* 192(6):573–586.
- 512 2. Fenton MB (2013) Questions, ideas and tools: Lessons from bat echolocation. *Anim*  
513 *Behav* 85(5):869–879.
- 514 3. Griffin DR (1958) Listening in the dark: the acoustic orientation of bats and men.
- 515 4. Matsubara J, Heiligenberg W (1978) How Well Do Electric Fish Electrolocate under  
516 Jamming ? *J Comp Physiol A* 125:285–290.
- 517 5. Ortega J (2016) *Sociality in bats* ed Ortega J (Springer International Publishing  
518 Switzerland) doi:10.1007/978-3-319-38953-0.
- 519 6. Erkert HG, et al. (1982) *Ecology of Bats* doi:10.1007/978-1-4613-3421-7.
- 520 7. Cherry CE (1953) Some Experiments on the Recognition of Speech, with One and with  
521 Two Ears. *J Acoust Soc Am*:975–976.
- 522 8. Bee MA, Micheyl C (2008) The Cocktail Party Problem: What Is It? How Can It Be  
523 Solved? And Why Should Animal Behaviorists Study It? *J Comp Psychol* 122(3):235–  
524 251.
- 525 9. Ulanovsky N, Moss CF (2008) What the bat’s voice tells the bat’s brain. *Proc Natl Acad*  
526 *Sci* 105(25):8491–8498.
- 527 10. Brumm H, Slabbekoorn H (2005) Acoustic Communication in Noise. *Adv Study Behav*  
528 35(05):151–209.
- 529 11. Amichai E, Blumrosen G, Yovel Y (2015) Calling louder and longer: How bats use  
530 biosonar under severe acoustic interference from other bats. *Proc R Soc B Biol Sci*  
531 282(1821). doi:10.1098/rspb.2015.2064.
- 532 12. Cvikel N, et al. (2015) Bats aggregate to improve prey search but might be impaired  
533 when their density becomes too high. *Curr Biol* 25(2):206–211.
- 534 13. Gillam EH, et al. (2010) American Society of Mammalogists Echolocation behavior of  
535 Brazilian free-tailed bats during dense emergence flights Published by : American  
536 Society of Mammalogists Linked references are available on JSTOR for this article :  
537 Echolocation behavior of Brazil. *J Mammal* 91(4):967–975.
- 538 14. Gillam EH, Montero BK (2016) Influence of call structure on the jamming avoidance  
539 response of echolocating bats. *J Mammal* 97(1):14–22.
- 540 15. Lin Y, Abaid N, Müller R (2016) Bats adjust their pulse emission rates with swarm size

- 541 in the field. *J Acoust Soc Am* 140(6):4318–4325.
- 542 16. Ulanovsky N, Fenton MB, Tsoar A, Korine C (2004) Dynamics of jamming avoidance in  
543 echolocating bats. *Proc R Soc B Biol Sci* 271(1547):1467–1475.
- 544 17. Habersetzer J (1981) Adaptive echolocation sounds in the bat *Rhinopoma hardwickei*.  
545 *J Comp Physiol A* 144(4):559–566.
- 546 18. Jones G, Morton M, Hughes PM, Budden RM (1993) Echolocation, flight morphology  
547 and foraging strategies of some West African hipposiderid bats. *J Zool* 230(3):385–  
548 400.
- 549 19. Jarvis J, Jackson W, Smotherman MS (2013) Groups of bats improve sonar efficiency  
550 through mutual suppression of pulse emissions. *Front Physiol* 4:1–9.
- 551 20. Adams AM, Davis K, Smotherman MS (2017) Suppression of emission rates improves  
552 sonar performance by flying bats. *Sci Rep* 7:1–9.
- 553 21. Falk B, Jakobsen L, Surlykke A, Moss CF (2014) Bats coordinate sonar and flight  
554 behavior as they forage in open and cluttered environments. *J Exp Biol* 217(24):4356–  
555 4364.
- 556 22. Surlykke A, et al. (1993) Echolocation in two very small bats from Thailand  
557 *Craseonycteris thonglongyai* and *Myotis siligorensis*. *Behav Ecol Sociobiol* 33(1):1–12.
- 558 23. Tressler J, Smotherman MS (2009) Context-dependent effects of noise on  
559 echolocation pulse characteristics in free-tailed bats. *J Comp Physiol A Neuroethol*  
560 *Sensory, Neural, Behav Physiol* 195(10):923–934.
- 561 24. Møhl B, Surlykke A (1989) Detection of sonar signals in the presence of pulses of  
562 masking noise by the echolocating bat, *Eptesicus fuscus*. *J Comp Physiol A*  
563 165(1):119–124.
- 564 25. Lin Y, Abaid N (2015) Modeling perspectives on echolocation strategies inspired by  
565 bats flying in groups. *J Theor Biol* 387:46–53.
- 566 26. Perkins ML, Frank HK, Pauly JM, Hadly EA (2017) Frequency shifting reduces but does  
567 not eliminate acoustic interference between echolocating bats: A theoretical analysis.  
568 *J Acoust Soc Am* 142(4):2133–2142.
- 569 27. Jones G (1999) Scaling of echolocation call parameters in bats. *J Exp Biol*  
570 202(23):3359–3367.
- 571 28. Griffin DR, Galambos R (1941) The sensory basis of obstacle avoidance by flying bats. *J*  
572 *Exp Zool* 86(3):481–506.

- 573 29. Hase K, et al. (2018) Bats enhance their call identities to solve the cocktail party  
574 problem. *Commun Biol* 1(1):39.
- 575 30. Ebata M (2003) Spatial unmasking and attention related to the cocktail party  
576 problem. *Acoust Sci Technol* 24(5):208–219.
- 577 31. Sümer S, Denzinger A, Schnitzler H-U (2009) Spatial unmasking in the echolocating Big  
578 Brown Bat, *Eptesicus fuscus*. *J Comp Physiol A* 195(5):463–472.
- 579 32. Yost WA (2007) Fundamentals of hearing: an introduction.
- 580 33. Siewert I, Schillinger T, Schmidt S (2004) Forward masking and the consequence on  
581 echo perception in the gleaning bat, *Megaderma lyra*. *Echolocation in Bats and*  
582 *Dolphins*, eds Thomas JA, Moss CF, Vater M (University of Chicago Press), pp 266–268.
- 583 34. Couzin ID, Krause J, James R, Ruxton GD, Franks NR (2002) Collective memory and  
584 spatial sorting in animal groups. *J Theor Biol* 218:1–11.
- 585 35. Grégoire G, Chaté H (2004) Onset of collective and cohesive motion. *Phys Rev Lett*  
586 92(2):025702.
- 587 36. Vicsek T, Czirók A, Ben-Jacob E, Cohen I, Schochet O (1995) Novel Type of Phase  
588 Transition in a System of Self-Driven Particles. *Phys Rev Lett* 75(6):1226–1229.
- 589 37. Reynolds CW (1987) Flocks, herds and schools : a Distributed Behavioral Model.  
590 *Comput Graph (ACM)* 21(4):25–34.
- 591 38. Sumpter DJT (2006) The principles of collective animal behaviour. *Philos Trans R Soc B*  
592 *Biol Sci* 361(1465):5–22.
- 593 39. Vicsek T, Zafeiris A (2012) Collective motion. *Phys Rep* 517(3–4):71–140.
- 594 40. Bode NWFF, et al. (2011) Limited interactions in flocks: Relating model simulations to  
595 empirical data. *J R Soc Interface* 8:301–304.
- 596 41. Ballerini M, et al. (2008) Interaction ruling animal collective behavior depends on  
597 topological rather than metric distance: Evidence from a field study. *Proc Natl Acad*  
598 *Sci* 105(4):1232–1237.
- 599 42. Cvikel N, et al. (2015) On-board recordings reveal no jamming avoidance in wild bats.  
600 *Proc R Soc B Biol Sci* 282(1798). doi:10.1098/rspb.2014.2274.
- 601 43. Luo J, Goerlitz HR, Brumm H, Wiegrebe L (2015) Linking the sender to the receiver:  
602 Vocal adjustments by bats to maintain signal detection in noise. *Sci Rep* 5(June):1–11.
- 603 44. Hase K, Miyamoto T, Kobayasi KI, Hiryu S (2016) Rapid frequency control of sonar  
604 sounds by the FM bat, *Miniopterus fuliginosus*, in response to spectral overlap. *Behav*

- 605            *Processes* 128:126–133.
- 606    45.    Miller GA., Licklider JCR (1950) The intelligibility of interrupted speech. *J Acoust*  
607            22(2):167–173.
- 608    46.    Surlykke A (1992) Target ranging and the role of time-frequency structure of synthetic  
609            echoes in big brown bats, *Eptesicus fuscus*. *J Comp Physiol A* 170(1):83–92.
- 610    47.    Petrites AE, Eng OS, Mowlds DS, Simmons JA, Delong CM (2009) Interpulse interval  
611            modulation by echolocating big brown bats (*Eptesicus fuscus*) in different densities of  
612            obstacle clutter. *J Comp Physiol A Neuroethol Sensory, Neural, Behav Physiol*  
613            195(6):603–617.
- 614    48.    Bates ME, Stamper SA, Simmons JA (2008) Jamming avoidance response of big brown  
615            bats in target detection. *J Exp Biol* 211(1):106–113.
- 616    49.    Luo J, Moss CF (2017) Echolocating bats rely on audiovocal feedback adapt sonar  
617            signal design. *Proc Natl Acad Sci U S A* 114(41):10978–10983.
- 618    50.    Corcoran AJ, Moss CF (2017) Sensing in a noisy world: lessons from auditory  
619            specialists, echolocating bats. *J Exp Biol* 220(24):4554–4566.
- 620    51.    Simmons JA, Gaudette JE (2012) Biosonar echo processing by frequency-modulated  
621            bats. *IET Radar, Sonar Navig* 6(6):556–565.
- 622    52.    Ghose K, Horiuchi TK, Krishnaprasad PS, Moss CF (2006) Echolocating bats use a  
623            nearly time-optimal strategy to intercept prey. *PLoS Biol* 4(5):865–873.
- 624    53.    Ghose K (2006) Steering by Hearing: A Bat’s Acoustic Gaze Is Linked to Its Flight Motor  
625            Output by a Delayed, Adaptive Linear Law. *J Neurosci* 26(6):1704–1710.
- 626    54.    Yovel Y, Melcon ML, Franz MO, Denzinger A (2009) The Voice of Bats : How Greater  
627            Mouse-eared Bats Recognize Individuals Based on Their Echolocation Calls. 5(6).  
628            doi:10.1371/journal.pcbi.1000400.
- 629    55.    Fletcher H (1940) Auditory Patterns. *Rev Mod Phys* 12(January):47–66.
- 630    56.    Fay RR (2008) Sound Source Perception and Stream Segregation in Nonhuman  
631            Vertebrate Animals. *Auditory Perception of Sound Sources*, eds Yost WA, Popper AN,  
632            Fay RR (Springer Science+Business Media, LLC), pp 307–323.
- 633    57.    Hafter ER, Sarampalis A, Loui P (2008) Auditory Attention and Filters. *Auditory*  
634            *Perception of Sound Sources*, eds Yost WA, Popper AN, Fay RR (Springer  
635            Science+Business Media, LLC), pp 115–142.
- 636    58.    Culling JF, Stone MA (2017) Energetic masking and masking release. *The Auditory*

- 637            *System and the Cocktail Party*, eds Middlebrooks JC, Simon JZ, Popper AN, Fay RR  
638            (ASA Press), pp 41–74.
- 639 59.    Obrist MK, Fenton MB, Eger JL, Schlegel P a (1993) What ears do for bats: a  
640            comparative study of pinna sound pressure transformation in chiroptera. *J Exp Biol*  
641            180:119–152.
- 642 60.    Stidsholt L, et al. (2018) A 2.6-g sound and movement tag for studying the acoustic  
643            scene and kinematics of echolocating bats. *Methods Ecol Evol* (October):1–11.
- 644 61.    Mac Aodha O, et al. (2018) Bat detective—Deep learning tools for bat acoustic signal  
645            detection. *PLoS Comput Biol* 14(3):1–19.
- 646 62.    Seibert AM, Koblitz JC, Denzinger A, Schnitzler HU (2015) Bidirectional echolocation in  
647            the bat *Barbastella barbastellus*: Different signals of low source level are emitted  
648            upward through the nose and downward through the mouth. *PLoS One* 10(9):1–17.
- 649 63.    Brinkløv S, Fenton MB, Ratcliffe JM (2013) Echolocation in oilbirds and swiftlets. *Front*  
650            *Physiol* 4 MAY(May):1–12.
- 651 64.    Surlykke A (2014) *Biosonar* ed Surlykke A doi:10.1007/978-1-4614-9146-0.  
652  
653
